# Supplementary material
Source: PubMed Central journal article supplement (PMC6259321)
Supplement: Supplemental_material.pdf [file Supplemental_material.pdf]

## **ONLINE SUPPLEMENT**

### VARIABILITY OF FUNCTIONAL OUTCOME MEASURES USED IN ANIMAL MODELS OF STROKE AND VASCULAR COGNITIVE IMPAIRMENT – A REVIEW OF CONTEMPORARY STUDIES

Tuuli M. Hietamies<sup>1†</sup>, BSc (Hons); Caroline Ostrowski<sup>1†</sup>, MBChB; Zhong Pei<sup>2</sup>, PhD; Luyang Feng<sup>2</sup>, PhD; Christopher McCabe<sup>3</sup>, PhD; Lorraine M. Work<sup>1\*</sup>, PhD; Terence J. Quinn<sup>1</sup>, MBChB, PhD

<sup>1</sup>Institute of Cardiovascular & Medical Sciences; College of Medical, Veterinary and Life Sciences; University of Glasgow; Glasgow; United Kingdom

<sup>2</sup>Department of Neurology, The First Affiliated Hospital, Sun Yat-Sen University, Guangzhou Shi, Guangdong Sheng, China

<sup>3</sup>Institute of Neuroscience & Psychology; College of Medical, Veterinary and Life Sciences; University of Glasgow; Glasgow; United Kingdom

### Supplementary Results/Tables

**Supplementary Table I: Impact factor of chosen journal titles.** The impact factor (2016) of each journal title chosen for inclusion in literature search was obtained from each journal homepage.

| Journal Title                                      | Subject class        | Impact Factor |
|----------------------------------------------------|----------------------|---------------|
| Brain                                              | Neurology            | 10.292        |
| Circulation                                        | Vascular             | 18.88         |
| Experimental Neurology                             | Neurology            | 4.706         |
| Hypertension                                       | Vascular             | 6.857         |
| International Journal of Stroke                    | Stroke (Clinical)    | 3.314         |
| Journal of Cerebral Blood Flow & Metabolism        | Stroke (Preclin)     | 5.081         |
| Journal of Neuropathology & Experimental Neurology | Neurology            | 3.49          |
| Journal of Neuroscience                            | Neuroscience         | 5.988         |
| Journal of Stroke & Cerebrovascular Disease        | Stroke (Clinical)    | 1.598         |
| Nature Neuroscience                                | Neuroscience         | 19.912        |
| Neurobiology of Disease                            | Neurorehabilitation  | 5.227         |
| Neurorehabilitation & Neural Repair                | Neurorehabilitation  | 4.107         |
| Stroke                                             | Stroke (Clinical)    | 6.032         |
| Translational Stroke Research                      | Stroke (Preclinical) | 8.266         |

**Supplementary Table II: Prevalence of stroke and VCI models.** Disease models used in stroke and VCI studies included in the final analysis. Percentage was calculated as proportion of total amount of papers included (n=636 and n=37, respectively). AD=Alzheimer's Disease, VD=Vascular Dementia, CADASIL=Cerebral Autosomal-Dominant Arteriopathy with Subcortical Infarcts and Leukoencephalopathy, MCAO=Middle Cerebral Artery Occlusion, TGF=Transforming Growth Factor.

| Model                             | All papers, n (%) |
|-----------------------------------|-------------------|
| <b>Ischemic stroke (n=559)</b>    |                   |
| Transient MCAO                    | 342 (54)          |
| Permanent MCAO                    | 109 (17)          |
| Thrombotic stroke                 | 51 (8)            |
| Endothelin induced                | 22 (3)            |
| Hypoxia-Ischemia                  | 23 (4)            |
| Global Ischemia                   | 12 (2)            |
| <b>Haemorrhagic stroke (n=84)</b> |                   |
| Intracerebral                     | 55 (9)            |
| Subarachnoid                      | 28 (4)            |
| Intraventricular                  | 1 (0.2)           |

VCI (n=37)

|                                |         |
|--------------------------------|---------|
| Permanent global hypoperfusion | 11 (30) |
| AD                             | 9 (24)  |
| Post-stroke dementia           | 5 (14)  |
| Microinfarcts                  | 3 (8)   |
| Hypertension + AD mutation     | 2 (5)   |
| Hypertension induced VD        | 2 (5)   |
| CADASIL                        | 1 (3)   |
| Dyslipidaemia + AD             | 1 (3)   |
| Dyslipidaemia induced VD       | 1 (3)   |
| AD + MCAO                      | 1 (3)   |
| TGF-induced fibrosis           | 1 (3)   |

---

**Supplementary Table III: All functional outcome assessments used in reviewed stroke trials.** Table showing all recorded outcomes measures found in the stroke articles analyzed from chosen journals between January 2005-December 2015 inclusive. Percentages calculated as portion of all articles used in final review (n=636). CRT= choice reaction time.

| Functional assessment              | All papers, n (%) |
|------------------------------------|-------------------|
| Neurological deficit score         | 471 (74)          |
| Rotarod                            | 94 (15)           |
| Grid walk / Foot fault             | 68 (11)           |
| Adhesive removal test              | 59 (9)            |
| Cylinder test                      | 56 (9)            |
| String / Wire / Grip / Swing test  | 50 (8)            |
| Corner turn test                   | 45 (7)            |
| Limb placing test                  | 44 (7)            |
| Beam test                          | 42 (7)            |
| T or Y or Radial arm maze          | 38 (6)            |
| Locomotor activity                 | 33 (5)            |
| Side-walking / Circling / Rotation | 29 (5)            |
| Tail suspension / Body swing       | 16 (3)            |
| Morris water maze                  | 14 (2)            |
| Elevated plus maze                 | 11 (2)            |
| Ladder test                        | 11 (2)            |
| Gait analysis                      | 9 (1)             |
| Novel object recognition           | 8 (1)             |

|                                         |         |
|-----------------------------------------|---------|
| Postural reflex                         | 7 (1)   |
| Skilled-reaching / Staircase task       | 5 (1)   |
| Barnes maze                             | 4 (1)   |
| Passive avoidance                       | 3 (1)   |
| Negative geotaxis                       | 3 (1)   |
| Whisker / Tactile                       | 3 (1)   |
| Standard intracortical microstimulation | 3 (1)   |
| Fear conditioning                       | 2 (0.3) |
| Parallel bar crossing                   | 2 (0.3) |
| Forced swim test                        | 2 (0.3) |
| Inclined plane                          | 2 (0.3) |
| Righting reflex                         | 2 (0.3) |
| Social novel odour recognition task     | 2 (0.3) |
| Bradykinesia assessment task            | 1 (0.2) |
| CRT task                                | 1 (0.2) |
| Drinking efficiency                     | 1 (0.2) |
| Forepaw stimulation                     | 1 (0.2) |
| Hindlimb retraction                     | 1 (0.2) |
| Hind-paw footprints (walking behaviour) | 1 (0.2) |
| Lateral pressure towards an edge        | 1 (0.2) |
| Motor mapping                           | 1 (0.2) |
| Pasta-matrix reaching task              | 1 (0.2) |
| Postural instability test               | 1 (0.2) |
| Recording mouse ultrasonic vocalization | 1 (0.2) |

|                                        |         |
|----------------------------------------|---------|
| Right forelimb resting motor threshold | 1 (0.2) |
| Robotic handle-pull task               | 1 (0.2) |
| Step test                              | 1 (0.2) |
| Straight alley swim                    | 1 (0.2) |
| Sucrose preference test                | 1 (0.2) |
| Amount of food consumed                | 1 (0.2) |

---

**Supplementary Table IV: All NDS used in preclinical stroke studies.** All recorded NDS cited in preclinical stroke articles. Methods were considered as ‘not found’ when no original battery scale was found after going 3 sources back. Percentage was calculated as portion of papers using NDS that were included in the final analysis (n=469).

| NDS original                              | All papers using NDS, n (%) |
|-------------------------------------------|-----------------------------|
| Bederson <i>et al.</i> <sup>1</sup>       | 175 (37)                    |
| Garcia <i>et al.</i> <sup>2</sup>         | 63 (13)                     |
| Other Rodent NDS                          | 57 (12)                     |
| Chen J. <i>et al.</i> <sup>3</sup>        | 39 (8)                      |
| NDS method not found                      | 29 (6)                      |
| Non-rodent NDS                            | 19 (4)                      |
| Clark <i>et al.</i> <sup>4</sup>          | 17 (4)                      |
| Belayev <i>et al.</i> <sup>5</sup>        | 14 (3)                      |
| Li <i>et al.</i> <sup>6</sup>             | 11 (2)                      |
| Hunter <i>et al.</i> <sup>7</sup>         | 10 (2)                      |
| Reglodi <i>et al.</i> <sup>8</sup>        | 8 (2)                       |
| DeRyck <i>et al.</i> <sup>9</sup>         | 7 (2)                       |
| Pérez-Asensio <i>et al.</i> <sup>10</sup> | 5 (1)                       |
| Petullo <i>et al.</i> <sup>11</sup>       | 4 (1)                       |
| Lenzlinger <i>et al.</i> <sup>12</sup>    | 2 (0.4)                     |



**Supplementary Table V: Variations of the Bederson<sup>1</sup> scale reported.** Percentage calculated as portion of all articles citing Bederson's as the original (n=175).

| Type of Bederson's used   | n(%)    |
|---------------------------|---------|
| Original Bederson's       | 24 (14) |
| Modified Bederson's 0-3   | 11 (6)  |
| Modified Bederson's 0-4   | 86 (49) |
| Modified Bederson's 0-4.5 | 1 (0.6) |
| Modified Bederson's 0-5   | 34 (19) |
| Modified Bederson's 0-6   | 4 (2)   |
| Modified Bederson's 0-7   | 4 (2)   |
| Modified Bederson's 0-8   | 5 (3)   |
| Modified Bederson's 0-9   | 1 (0.6) |
| Modified Bederson's 0-10  | 2 (1)   |
| Modified Bederson's 0-15  | 2 (1)   |
| Modified Bederson: 0-20   | 1 (0.6) |

**Supplementary Table VI: All functional assessments used in VCI preclinical papers.** All recorded functional assessments found in the VCI papers analyzed. Percentage calculated as portion of all papers used in final review. (n=37).

| Functional assessment                   | All papers, n (%) |
|-----------------------------------------|-------------------|
| Morris water maze (MWM)                 | 23 (60)           |
| Novel object recognition                | 8 (22)            |
| T or Y or radial arm maze               | 8 (22)            |
| Locomotor activity                      | 6 (16)            |
| Neurological deficit score              | 5 (14)            |
| Rotarod                                 | 4 (11)            |
| String / Wire / Grip / Swing test       | 4 (11)            |
| Barnes maze                             | 3 (8)             |
| Beam test                               | 3 (8)             |
| Fear conditioning                       | 2 (5)             |
| Gait analysis                           | 2 (5)             |
| Elevated plus maze                      | 1 (3)             |
| Adhesive label removal test             | 1 (3)             |
| Buried food retrieval (olfactory)       | 1 (3)             |
| Inclined plane task                     | 1 (3)             |
| Nest construction test                  | 1 (3)             |
| Circular hole board (dry maze)          | 1 (3)             |
| Porsolt swim test                       | 1 (3)             |
| Social interaction in novel environment | 1 (3)             |



### **Supplementary References**

1. Bederson JB, Pitts LH, Tsuji M, Nishimura MC, Davis RL and Bartkowski H. Rat middle cerebral artery occlusion: evaluation of the model and development of a neurologic examination. *Stroke*. 1986; 17: 472-6.
2. Garcia JH, Wagner S, Liu K and Hu X. Neurological Deficit and Extent of Neuronal Necrosis Attributable to Middle Cerebral Artery Occlusion in Rats: Statistical Validation. *Stroke*. 1995; 26: 627-35.
3. Chen J, Sanberg PR, Li Y, et al. Intravenous Administration of Human Umbilical Cord Blood Reduces Behavioral Deficits After Stroke in Rats. *Stroke*. 2001; 32: 2682.
4. Clark WM, Lessov N, Dixon MP and Eckenstein F. Monofilament intraluminal middle cerebral artery occlusion in the mouse. *Neurological Research*. 1997; 19: 641-8.
5. Belayev L, Alonso OF, Busto R, Zhao W and Ginsberg MD. Middle Cerebral Artery Occlusion in the Rat by Intraluminal Suture. *Stroke*. 1996; 27: 1616.
6. Li Y, Chopp M, Chen J, et al. Intraatrial Transplantation of Bone Marrow Nonhematopoietic Cells Improves Functional Recovery After Stroke in Adult Mice. *Journal of Cerebral Blood Flow & Metabolism*. 2000; 20: 1311-9.
7. Hunter AJ, Hatcher J, Virley D, et al. Functional assessments in mice and rats after focal stroke. *Neuropharmacology*. 2000; 39: 806-16.
8. Reglódi D, Tamás A and Lengvári I. Examination of sensorimotor performance following middle cerebral artery occlusion in rats. *Brain Research Bulletin*. 2003; 59: 459-66.
9. De Ryck M, Van Reempts J, Borgers M, Wauquier A and Janssen PA. Photochemical stroke model: flunarizine prevents sensorimotor deficits after neocortical infarcts in rats. *Stroke*. 1989; 20: 1383.

10. Pérez-Asensio FJ, Hurtado O, Burguete MC, et al. Inhibition of iNOS activity by 1400W decreases glutamate release and ameliorates stroke outcome after experimental ischemia. *Neurobiology of Disease*. 2005; 18: 375-84.
11. Petullo D, Masonic K, Lincoln C, Wibberley L, Teliska M and Yao D-L. Model development and behavioral assessment of focal cerebral ischemia in rats. *Life Sciences*. 1999; 64: 1099-108.
12. Lenzlinger PM, Saatman KE, Hoover RC, et al. Inhibition of vascular endothelial growth factor receptor (VEGFR) signaling by BSF476921 attenuates regional cerebral edema following traumatic brain injury in rats. *Restorative Neurology & Neuroscience*. 2004; 22: 73-9.
